# Supplementary material for: Goethite Reduction by a Neutrophilic Member of the Alphaproteobacterial Genus Telmatospirillum
Source: PubMed Central journal article supplement (PMC6933298; doi:10.3389/fmicb.2019.02938), 2019-12-20
Supplement: Table_1.pdf [file Table_1.pdf]

## Supplementary Table S1.

### Deduced amino acid sequences of genes proposed to be involved in iron cycling in the *Telmatospirillum* MAG.

>SA7853BIN3\_00738 Urocanate reductase  
MSKTEVSRRLQAVTVGAVAVGGGAALNMAVPGTAEALVRKLPGNWDETWVDVIVVVGSGF  
AGLAAAASAAAGAKTILLEKMPSTYGGNSIINGGVFAAWDDKWHYREKLNLTGDSPEQHF  
QDILKGGDYYSIPELAKLVADGSADALAWVVDEGGAELRPTVTRAGGHTAYRTHAAKSGV  
GREYTEALRkiaEKHGKPTLGTEVTWIWRADADPKSPVLGVEVVRGKVMNLKANKAVI  
LASGGFSQNVDMRMSHNPRLTSDYNCTNHKGATGEIHKFAQAVGADTLQMNFIQLYPYAE  
PETGLLDAQAVYFNGPGYGIYVSKQGRFVNELEERRDVVAYAQINLGKDAKPTWSIFT  
EAMILPMGGAPEEIEDGLKRGRFVKADTIPELAQKCKIPSDTLVDTVNKYIQYHKDGKDP  
EFNKPI TPAMFSLEKGPYYAIAQWPVAVHFCMGLRTNAKTQVIDVFGSPIPKLYAAGEVV  
GGVHGSNRLGSNAIPTCIVFGRTAGRNAVL D

>SA7853BIN3\_04245 Denitrification system component NirT  
MNQSDEMVERRRPTLWGLAVGIWGLFARPSAQLSLGLLLLLTGFLAGILFWGGFNWGLEMT  
NNETFCRSCHEMDQNSYREYRTSVHDQNHAGVRATCPDCHVPHDWHKMKRkiaASSEVF  
HHLTGEIDTREKFEAKRLDLARSVWQTMKETDSRECRNCHSFDSMDLARQTDRARVAHTD  
AETDGRTCIDCHKGIAHRLPAGMTEAERELNQSMFVGNRR

>SA7853BIN3\_04711 Cytochrome c-552  
MNPKVSVSSLLASVAFLALAAAPAQAI DWSGVQKDVVLLYPGQASLEWVLTNGEHDGAA  
KFKQKNCKECHIGEENKMGPLAASGKVNPEQPIAGKPGTIPAKVKVAHDADTLYVHLEF  
AEGTQPDQAKYATKVSMMLSDGKVPADRAGCWAACHDDSTDMASASGATRTKYLK  
PRAKITRPGGDEMKSADDELAKLKADGYGLEWAEELNPGSPAHAAYTVFDKREEAKPA  
AVAAEASFANGTWSVTL SRKHLHAGAPYKIDIDPGKSFTVGFVHAGHTARRFHVVSIDQSL  
VLDQGTADFVAAK

>SA7853BIN3\_04712 hypothetical protein  
MIFRKLVLIGLVSLAITLSSAAAARAEDPAPATTPAVYAEKGDQTCCLKCHDNEQVTSILK  
TPHGTKGDIRTPAANHGCECHGASPEHVASRPAKGEKKALPAIRFSGPNISPVADRNAV  
CLTCHENSARINWQGSQHASN DVACSTCHTVHAQKDPVLVKATQPKCFTCHAQQRAESF  
QRSHHPVREGKVCADCHNVHGSPPGPKLVKEVSNINETCYNCHAEKRGPMLEWHQPVRENC  
DNCHTPHGSSQAALLTERMPYLCSSCHSATGNNSGGWFGGSRSLPGHSPSNVMMNELNN  
RSCLNCHSNIHGSNSPPGQAFLR

>SA7853BIN3\_04713 hypothetical protein  
MKKQYSLRFLALAGVCLAPLAAQAQDFDLGDAPQAAAPAKQYTNEIDVGVRYQSSTSPLY  
GRYTGTDSKGFGLGGFHLESTMPASGAPLKVEATGTNLNFQPDHQPNALAPESEVN  
VSAGQQGIWKAGAYYNAITYTGQKFLTPYTASGNLAPGQQAFFGGQTITGYTAAGVPILSA  
VPAAGKPGTAAYVNNAPPEFQTTAGTRRDIGGVDGKYIIDAWTITGFRHEHKEGTTLQ  
TMYTSNAGIAFPQPVNYDTRYNVTA AFNTRRLQAQLGYNFSKFSDNASFFTSPLYFATS  
ATAQSVSVYSQPPSNFAHYVNGAAGYNLTPTRITSNFQYGLEMSDGALGAGTATPLSEI  
GGAASAARLALNPGGDQMARVYNANLGVTSRPMAGLDVKVGYGIDGRENSSSPMTVYVNS  
HGDGAPALIGNILQONWTKQKATLEAGYKVLNPTKVSVGYRLDDVHRSAGAVASLPMSSL  
GWVGHSTENTEWIKVSDHSLAQLDSSVTYEHAVRTGLMELAPGSGTVTNGVQVQNSSMPFY  
EAPRTSDRVKLRADYMPADQWTIGANARYEANHYNSSTITGTQRDYNTSAGPDITYSPT  
KAISLHGFYTYEEIYYVNRNGVPSLTKNKGWSAATTDVHTAGVSADWQVSRERLKVGA  
EYTFSYGDIGYNLYDGLALNTATAASYNVSNLPTIDSSMHSVKLRAEYKLTDAITLMG  
GYGFDMYKDNDSYGSWSPGMASNASGLAAPLVNTFTXXXGSPDFCPLGRSASSGPFFFT  
LAGAQAPALFSSPWREKLRPLFFLHSARHRRPA

>SA7853BIN3\_04795 Citrate synthase  
MTQDENKDLVTLVDGASGRFELPLIPGTVGPKVIDIRSLYGLTGYFTYDPGYTSTGSC  
SKITYIDGDNIGILLHRGYPIDQLAEHSDYLEVCYLLLRGELPDAKQKAKFEGDIRNHTMV  
HEQINSFYRGRFRDAHPMAVMCGVVGALSIFYHDSLADIADPHQRMVASHRMI AKMPTIAA  
WAYKYSRGEPIYPRNSLSFAENFLHMMFATPCEEYKVN PVLARAMERILILHADHEQNA  
STSTVRMAGSSGANPFACIAAGIASLWGPAGHGANEAVLQMLTQIGSKERIPFIARAKD  
KNDPFRMLMGFHRVYKNYDPRAKVMQRTCHEVLDDELGVRDEPLELELAMELERIALED  
PYFVDKKLYPNVDFYSGIIIFKAMGIPVSMFTVLFVAVARTVGVVAQWNEMIGDPHQKIGRPRQL  
YTGAHRDFVPLHARG

>SA7853BIN3\_04796 hypothetical protein

MRTGVMPDFDAWDIIKVPFPYTDRPVREHRPAVVVAANGIQREHLLWVLMITSAENRG  
WPGDVGVSNLSEAGLPAESVVRTAKIATIEIKEAERIGSLPADDRILVAHYLTTGLARTT  
N
